# Supplementary material for: Attenuation of polyglutamine-induced toxicity by enhancement of mitochondrial OXPHOS in yeast and fly models of aging
Source: PubMed Central journal article supplement (PMC5349013; doi:10.15698/mic2016.08.518), 2016-07-26

## SUPPLEMENTARY MATERIAL

**Supplemental Figure 1. Suppression of polyQ-induced toxicity by *HAP4*-overexpression induced enhancement of mitochondrial biogenesis estimated by the colony formation units (CFU) assay.** Yeast CLS. Survival was estimated from the number of colonies formed from ~150 cells of each strain plated on non-inducing media (YPD) after 2 days of growth at 30°C. Error bars are S.D, n=3.

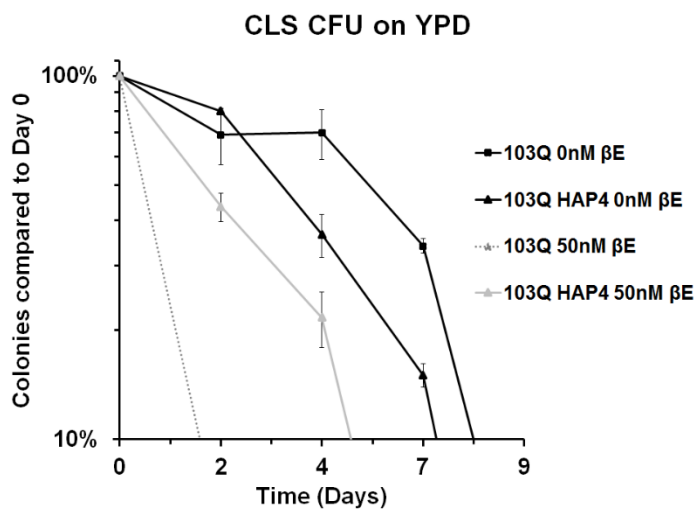

Supplement: mic-03-338-s01.pdf [file mic-03-338-s01.pdf]
